# Supplementary material for: Efficacy and Safety of Digital Single-Operator Cholangioscopy in the Diagnosis of Indeterminate Biliary Strictures by Targeted Biopsies: A Systematic Review and Meta-Analysis
Source: MDPI journal article supplement (doi:10.3390/diagnostics10090666), 2020-09-02
Supplement: s1 [file s1]

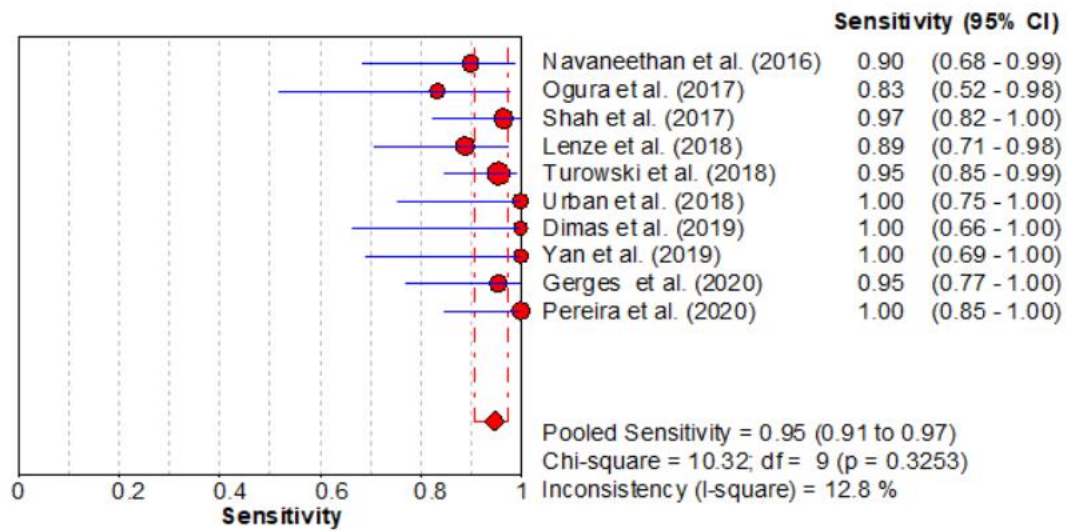

(a)

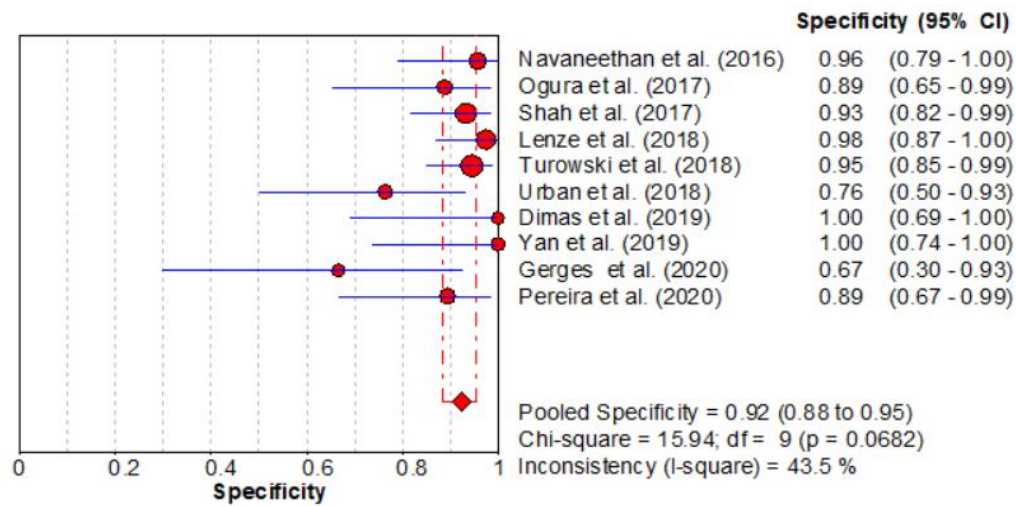

(b)

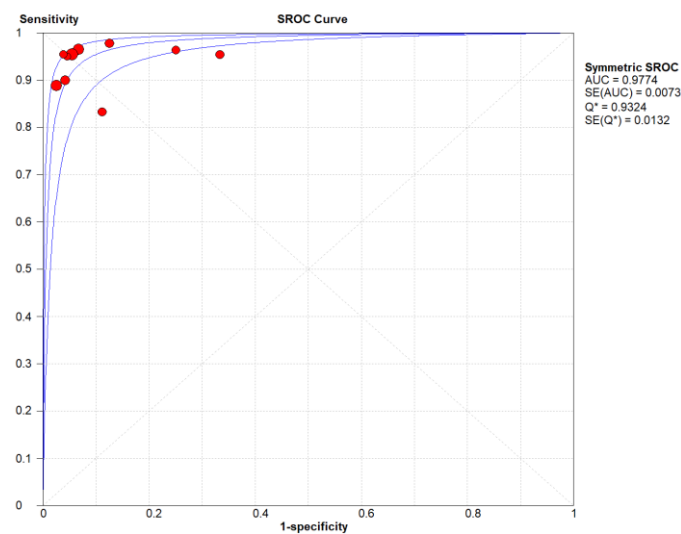

(c)

**Figure S1.** The forest plot of studies that reported the diagnostic yield of DSOC by VI. (a) The pooled

sensitivity for IBDS was 0.95 (95% CI: 0.91–0.97); **(b)** The pooled specificity for IBDS was 0.92 (95% CI: 0.88–0.95); **(c)** The summary receiver's operative characteristics (SROC), with an area under the curve (AUC) of 0.9774.
